# Supplementary material
Source: PubMed Central journal article supplement (PMC3805041)
Supplement: NIHMS498892-supplement-Supplemental.pdf [file NIHMS498892-supplement-Supplemental.pdf]

## **Online Supplement**

### **Effects of cannabis on lung function: a population-based cohort study**

Robert J Hancox, Richie Poulton, Margaret Ely, David Welch, D Robin Taylor, Christene R McLachlan, Justina M Greene, Terrie E Moffitt, Avshalom Caspi, Malcolm R Sears.

**Online table 1. Frequency of cannabis and tobacco use at each age.**

Cannabis use is reported for the past year, tobacco use is since the previous assessment.

Numbers in parentheses are the percentage of the sample assessed at each age.

| Age | n   | Cannabis use |                  |                | Tobacco use |              |                  |
|-----|-----|--------------|------------------|----------------|-------------|--------------|------------------|
|     |     | None         | Less than Weekly | Weekly or more | None        | Up to 10/day | More than 10/day |
| 18  | 932 | 514 (55)     | 337 (36)         | 81 (9)         | 595 (64)    | 275 (30)     | 52 (7)           |
| 21  | 955 | 459 (48)     | 339 (36)         | 157 (16)       | 545 (57)    | 364 (38)     | 46 (5)           |
| 26  | 975 | 487 (50)     | 326 (33)         | 162 (17)       | 533 (55)    | 215 (22)     | 227 (23)         |
| 32  | 967 | 607 (63)     | 222 (23)         | 138 (14)       | 557 (58)    | 179 (19)     | 231 (24)         |

**Online table 2. Lung function values according to cumulative joint-years of cannabis use by age 32.**

Mean (SD) values for lung function.

(a) Non-smokers of tobacco - Women

|                                       | <b>Cumulative joint years to age 32</b> |             |                |             |                    |             |
|---------------------------------------|-----------------------------------------|-------------|----------------|-------------|--------------------|-------------|
|                                       | <b>Nil</b>                              |             | <b>Up to 1</b> |             | <b>More than 1</b> |             |
|                                       | n                                       | Mean (SD)   | n              | Mean (SD)   | n                  | Mean (SD)   |
| <b>FEV<sub>1</sub> (L)</b>            | 112                                     | 3.3 (0.5)   | 84             | 3.4 (0.4)   | 8                  | 3.6 (0.6)   |
| <b>FVC (L)</b>                        | 112                                     | 4.1 (0.6)   | 84             | 4.3 (0.6)   | 8                  | 4.3 (0.7)   |
| <b>FEV<sub>1</sub>/FVC (%)</b>        | 112                                     | 80.3 (6.1)  | 84             | 80.7 (5.6)  | 8                  | 84.4 (6.8)  |
|                                       |                                         |             |                |             |                    |             |
| <b>TLC (L)</b>                        | 107                                     | 5.5 (0.7)   | 81             | 5.6 (0.7)   | 7                  | 6.0 (0.2)   |
| <b>FRC (L)</b>                        | 107                                     | 2.7 (0.6)   | 81             | 2.8 (0.6)   | 7                  | 2.8 (0.6)   |
| <b>RV (L)</b>                         | 107                                     | 1.3 (0.3)   | 81             | 1.3 (0.3)   | 7                  | 1.5 (0.3)   |
| <b>Raw (cmH<sub>2</sub>O/L/s)</b>     | 107                                     | 1.4 (0.6)   | 81             | 1.4 (0.7)   | 7                  | 1.9 (1.2)   |
| <b>sGaw (mL/s/cmH<sub>2</sub>O/L)</b> | 107                                     | 0.27 (0.13) | 81             | 0.26 (0.12) | 7                  | 0.20 (0.10) |
|                                       |                                         |             |                |             |                    |             |
| <b>TLCO (mL/min/mmHg)</b>             | 110                                     | 25.0 (3.6)  | 81             | 25.1 (3.4)  | 7                  | 26.8 (4.3)  |
| <b>TLCO/VA (mL/min/mmHg/L)</b>        | 110                                     | 4.9 (0.6)   | 81             | 4.9 (0.7)   | 7                  | 4.9 (1.0)   |
| <b>VA (L)</b>                         | 110                                     | 5.1 (0.7)   | 81             | 5.2 (0.7)   | 7                  | 5.5 (0.4)   |

## (b) Non-smokers of tobacco - Men

|                                       | <b>Cumulative joint years to age 32</b> |             |                |             |                    |             |
|---------------------------------------|-----------------------------------------|-------------|----------------|-------------|--------------------|-------------|
|                                       | <b>Nil</b>                              |             | <b>Up to 1</b> |             | <b>More than 1</b> |             |
|                                       | n                                       | Mean (SD)   | n              | Mean (SD)   | n                  | Mean (SD)   |
| <b>FEV<sub>1</sub> (L)</b>            | 97                                      | 4.4 (0.6)   | 116            | 4.5 (0.6)   | 32                 | 4.4 (0.6)   |
| <b>FVC (L)</b>                        | 97                                      | 5.7 (0.8)   | 116            | 5.8 (0.7)   | 32                 | 5.8 (0.7)   |
| <b>FEV<sub>1</sub>/FVC (%)</b>        | 97                                      | 76.8 (6.8)  | 116            | 78.3 (6.5)  | 32                 | 76.0 (7.0)  |
|                                       |                                         |             |                |             |                    |             |
| <b>TLC (L)</b>                        | 93                                      | 7.4 (1.0)   | 114            | 7.4 (0.8)   | 31                 | 7.5 (0.9)   |
| <b>FRC (L)</b>                        | 94                                      | 3.4 (0.8)   | 114            | 3.4 (0.7)   | 31                 | 3.5 (0.7)   |
| <b>RV (L)</b>                         | 93                                      | 1.6 (0.5)   | 114            | 1.6 (0.3)   | 31                 | 1.6 (0.5)   |
| <b>Raw (cmH<sub>2</sub>O/L/s)</b>     | 94                                      | 1.2 (0.8)   | 114            | 1.3 (0.9)   | 31                 | 1.5 (1.0)   |
| <b>sGaw (mL/s/cmH<sub>2</sub>O/L)</b> | 94                                      | 0.28 (0.14) | 114            | 0.27 (0.17) | 31                 | 0.23 (0.15) |
|                                       |                                         |             |                |             |                    |             |
| <b>TLCO (mL/min/mmHg)</b>             | 94                                      | 36.0 (5.0)  | 114            | 36.1 (6.0)  | 32                 | 34.9 (5.1)  |
| <b>TLCO/VA (mL/min/mmHg/L)</b>        | 94                                      | 5.2 (0.7)   | 114            | 5.1 (0.8)   | 32                 | 4.9 (0.5)   |
| <b>VA (L)</b>                         | 94                                      | 7.0 (1.0)   | 114            | 7.1 (0.9)   | 32                 | 7.2 (0.9)   |

(c) Moderate smokers of tobacco (up to 10 pack years) - Women

|                                       | <b>Cumulative joint years to age 32</b> |             |                |             |                    |             |
|---------------------------------------|-----------------------------------------|-------------|----------------|-------------|--------------------|-------------|
|                                       | <b>Nil</b>                              |             | <b>Up to 1</b> |             | <b>More than 1</b> |             |
|                                       | n                                       | Mean (SD)   | n              | Mean (SD)   | n                  | Mean (SD)   |
| <b>FEV<sub>1</sub> (L)</b>            | 14                                      | 3.3 (0.4)   | 57             | 3.4 (0.5)   | 5                  | 3.3 (0.3)   |
| <b>FVC (L)</b>                        | 14                                      | 4.1 (0.6)   | 57             | 4.3 (0.5)   | 5                  | 4.2 (0.4)   |
| <b>FEV<sub>1</sub>/FVC (%)</b>        | 14                                      | 81.4 (6.1)  | 57             | 79.8 (6.1)  | 5                  | 77.1 (2.0)  |
|                                       |                                         |             |                |             |                    |             |
| <b>TLC (L)</b>                        | 14                                      | 5.6 (1.0)   | 56             | 5.6 (0.6)   | 5                  | 5.5 (0.8)   |
| <b>FRC (L)</b>                        | 14                                      | 2.8 (0.7)   | 56             | 2.9 (0.6)   | 5                  | 2.8 (0.9)   |
| <b>RV (L)</b>                         | 14                                      | 1.4 (0.6)   | 56             | 1.3 (0.3)   | 5                  | 1.3 (0.4)   |
| <b>Raw (cmH<sub>2</sub>O/L/s)</b>     | 14                                      | 1.2 (0.3)   | 56             | 1.4 (1.1)   | 5                  | 1.4 (0.5)   |
| <b>sGaw (mL/s/cmH<sub>2</sub>O/L)</b> | 14                                      | 0.31 (0.22) | 56             | 0.28 (0.20) | 5                  | 0.24 (0.09) |
|                                       |                                         |             |                |             |                    |             |
| <b>TLCO (mL/min/mmHg)</b>             | 14                                      | 24.1 (3.5)  | 55             | 24.5 (3.5)  | 5                  | 23.1 (3.3)  |
| <b>TLCO/VA (mL/min/mmHg/L)</b>        | 14                                      | 4.7 (0.6)   | 55             | 4.6 (0.6)   | 5                  | 4.6 (0.4)   |
| <b>VA (L)</b>                         | 14                                      | 5.2 (0.9)   | 55             | 5.4 (0.6)   | 5                  | 5.1 (0.7)   |

## (d) Moderate smokers of tobacco (up to 10 pack years) - Men

|                                       | <b>Cumulative joint years to age 32</b> |             |                |             |                    |             |
|---------------------------------------|-----------------------------------------|-------------|----------------|-------------|--------------------|-------------|
|                                       | <b>Nil</b>                              |             | <b>Up to 1</b> |             | <b>More than 1</b> |             |
|                                       | n                                       | Mean (SD)   | n              | Mean (SD)   | n                  | Mean (SD)   |
| <b>FEV<sub>1</sub> (L)</b>            | 6                                       | 4.3 (0.7)   | 31             | 4.4 (0.7)   | 26                 | 4.4 (0.8)   |
| <b>FVC (L)</b>                        | 6                                       | 5.5 (0.8)   | 31             | 5.7 (0.9)   | 26                 | 5.9 (0.9)   |
| <b>FEV<sub>1</sub>/FVC (%)</b>        | 6                                       | 78.3 (3.9)  | 31             | 77.1 (5.4)  | 26                 | 74.8 (6.8)  |
|                                       |                                         |             |                |             |                    |             |
| <b>TLC (L)</b>                        | 6                                       | 7.0 (1.0)   | 31             | 7.3 (1.0)   | 25                 | 7.7 (1.1)   |
| <b>FRC (L)</b>                        | 6                                       | 2.8 (0.7)   | 31             | 3.4 (0.7)   | 25                 | 3.4 (0.8)   |
| <b>RV (L)</b>                         | 6                                       | 1.4 (0.4)   | 31             | 1.6 (0.3)   | 25                 | 1.7 (0.4)   |
| <b>Raw (cmH<sub>2</sub>O/L/s)</b>     | 6                                       | 1.7 (0.6)   | 31             | 1.3 (0.7)   | 25                 | 1.4 (0.7)   |
| <b>sGaw (mL/s/cmH<sub>2</sub>O/L)</b> | 6                                       | 0.19 (0.07) | 31             | 0.25 (0.17) | 25                 | 0.21 (0.11) |
|                                       |                                         |             |                |             |                    |             |
| <b>TLCO (mL/min/mmHg)</b>             | 6                                       | 33.4 (7.0)  | 31             | 35.1 (4.1)  | 25                 | 34.7 (4.7)  |
| <b>TLCO/VA (mL/min/mmHg/L)</b>        | 6                                       | 5.1 (1.0)   | 31             | 5.1 (0.7)   | 25                 | 4.7 (0.6)   |
| <b>VA (L)</b>                         | 6                                       | 6.6 (0.8)   | 31             | 7.0 (1.0)   | 25                 | 7.5 (1.1)   |

## (e) Heavy smokers of tobacco (more than 10 pack years) - Women

|                                       | <b>Cumulative joint years to age 32</b> |             |                |             |                    |             |
|---------------------------------------|-----------------------------------------|-------------|----------------|-------------|--------------------|-------------|
|                                       | <b>Nil</b>                              |             | <b>Up to 1</b> |             | <b>More than 1</b> |             |
|                                       | n                                       | Mean (SD)   | n              | Mean (SD)   | n                  | Mean (SD)   |
| <b>FEV<sub>1</sub> (L)</b>            | 26                                      | 3.2 (0.3)   | 85             | 3.3 (0.5)   | 43                 | 3.3 (0.5)   |
| <b>FVC (L)</b>                        | 26                                      | 4.1 (0.4)   | 85             | 4.2 (0.6)   | 43                 | 4.2 (0.6)   |
| <b>FEV<sub>1</sub>/FVC (%)</b>        | 26                                      | 78.1 (4.8)  | 85             | 79.0 (6.6)  | 43                 | 78.6 (7.0)  |
|                                       |                                         |             |                |             |                    |             |
| <b>TLC (L)</b>                        | 25                                      | 5.5 (0.5)   | 82             | 5.6 (0.8)   | 41                 | 5.7 (0.8)   |
| <b>FRC (L)</b>                        | 25                                      | 2.7 (0.4)   | 82             | 2.8 (0.7)   | 41                 | 3.0 (0.7)   |
| <b>RV (L)</b>                         | 25                                      | 1.3 (0.3)   | 82             | 1.4 (0.3)   | 41                 | 1.5 (0.4)   |
| <b>Raw (cmH<sub>2</sub>O/L/s)</b>     | 25                                      | 1.4 (0.6)   | 82             | 1.4 (0.6)   | 41                 | 1.6 (0.7)   |
| <b>sGaw (mL/s/cmH<sub>2</sub>O/L)</b> | 25                                      | 0.26 (0.11) | 82             | 0.25 (0.10) | 41                 | 0.21 (0.10) |
|                                       |                                         |             |                |             |                    |             |
| <b>TLCO (mL/min/mmHg)</b>             | 24                                      | 22.7 (3.9)  | 83             | 23.7 (3.8)  | 42                 | 20.7 (2.5)  |
| <b>TLCO/VA (mL/min/mmHg/L)</b>        | 24                                      | 4.5 (0.7)   | 83             | 4.5 (0.6)   | 42                 | 4.0 (0.7)   |
| <b>VA (L)</b>                         | 24                                      | 5.1 (0.5)   | 83             | 5.3 (0.8)   | 42                 | 5.3 (0.7)   |

(f) Heavy smokers of tobacco (more than 10 pack years) - Men

|                                       | <b>Cumulative joint years to age 32</b> |             |                |             |                    |             |
|---------------------------------------|-----------------------------------------|-------------|----------------|-------------|--------------------|-------------|
|                                       | <b>Nil</b>                              |             | <b>Up to 1</b> |             | <b>More than 1</b> |             |
|                                       | n                                       | Mean (SD)   | n              | Mean (SD)   | n                  | Mean (SD)   |
| <b>FEV<sub>1</sub> (L)</b>            | 8                                       | 4.2 (0.9)   | 68             | 4.5 (0.5)   | 101                | 4.4 (0.7)   |
| <b>FVC (L)</b>                        | 8                                       | 5.4 (0.5)   | 68             | 5.9 (0.7)   | 101                | 5.8 (0.9)   |
| <b>FEV<sub>1</sub>/FVC (%)</b>        | 8                                       | 77.4 (12.0) | 68             | 76.9 (5.7)  | 101                | 75.3 (7.6)  |
|                                       |                                         |             |                |             |                    |             |
| <b>TLC (L)</b>                        | 8                                       | 7.2 (0.8)   | 65             | 7.7 (0.8)   | 92                 | 7.7 (1.1)   |
| <b>FRC (L)</b>                        | 8                                       | 3.6 (0.7)   | 65             | 3.6 (0.7)   | 92                 | 3.6 (0.9)   |
| <b>RV (L)</b>                         | 8                                       | 1.8 (0.3)   | 65             | 1.7 (0.4)   | 92                 | 1.8 (0.5)   |
| <b>Raw (cmH<sub>2</sub>O/L/s)</b>     | 8                                       | 1.4 (0.9)   | 65             | 1.2 (0.6)   | 92                 | 1.4 (0.7)   |
| <b>sGaw (mL/s/cmH<sub>2</sub>O/L)</b> | 8                                       | 0.24 (0.15) | 65             | 0.24 (0.12) | 92                 | 0.21 (0.11) |
|                                       |                                         |             |                |             |                    |             |
| <b>TLCO (mL/min/mmHg)</b>             | 9                                       | 33.2 (6.4)  | 67             | 32.5 (5.1)  | 95                 | 31.2 (5.7)  |
| <b>TLCO/VA (mL/min/mmHg/L)</b>        | 9                                       | 4.9 (0.6)   | 67             | 4.5 (0.7)   | 95                 | 4.4 (0.7)   |
| <b>VA (L)</b>                         | 9                                       | 6.8 (0.9)   | 67             | 7.3 (0.8)   | 95                 | 7.2 (1.0)   |



**Online table 3. Associations between cannabis use and lung function at age 32**

Linear regression analyses of lung function at age 32 using cannabis exposure as the predictor. Analyses adjust for sex and, except for FEV<sub>1</sub>/FVC and sGaw, for height. Analyses of TLCO also adjust for exhaled carbon monoxide and blood haemoglobin. Coefficients represent the difference in lung function associated with each joint-year of cannabis up to age 32.

|                                       | <b>n</b> | <b>Coefficient</b> | <b>95% CI</b>    | <b>p</b> |
|---------------------------------------|----------|--------------------|------------------|----------|
| <b>FEV<sub>1</sub> (mL)</b>           | 920      | 1.0                | -6.1 to 8.0      | 0.788    |
| <b>FVC (mL)</b>                       | 920      | 12.0               | 3.8 to 20.1      | 0.004    |
| <b>FEV<sub>1</sub>/FVC (%)</b>        | 920      | -0.14              | -0.24 to -0.05   | 0.003    |
|                                       |          |                    |                  |          |
| <b>TLC (mL)</b>                       | 884      | 29.5               | 19.5 to 39.5     | <0.001   |
| <b>FRC (mL)</b>                       | 885      | 22.0               | 12.7 to 31.3     | <0.001   |
| <b>RV (mL)</b>                        | 884      | 16.6               | 11.5 to 21.7     | <0.001   |
| <b>Raw (cmH<sub>2</sub>O/L/s)</b>     | 885      | 0.013              | 0.002 to 0.024   | 0.016    |
| <b>sGaw (mL/s/cmH<sub>2</sub>O/L)</b> | 885      | -4.2               | -6.3 to -2.2     | <0.001   |
|                                       |          |                    |                  |          |
| <b>TLCO (mL/min/mmHg)</b>             | 842      | -0.056             | -0.122 to 0.009  | 0.093    |
| <b>TLCO/VA (mL/min/mmHg/L)</b>        | 842      | -0.023             | -0.033 to -0.012 | <0.001   |
| <b>VA (mL)</b>                        | 895      | 19.0               | 9.0 to 29.0      | <0.001   |

**Online table 4. Associations between tobacco use and lung function at age 32**

Linear regression analyses of lung function at age 32 using tobacco exposure as the predictor.

Analyses adjust for sex and, except for FEV<sub>1</sub>/FVC and sGaw, for height. Analyses of TLCO

also adjust for exhaled carbon monoxide and blood haemoglobin. Coefficients represent the

difference in lung function associated with each pack-year of tobacco up to age 32.

|                                       | <b>n</b> | <b>Coefficient</b> | <b>95% CI</b>    | <b>p</b> |
|---------------------------------------|----------|--------------------|------------------|----------|
| <b>FEV<sub>1</sub> (mL)</b>           | 920      | -3.9               | -8.7 to 0.9      | 0.113    |
| <b>FVC (mL)</b>                       | 920      | 3.6                | -2.0 to 9.1      | 0.210    |
| <b>FEV<sub>1</sub>/FVC (%)</b>        | 920      | -0.13              | -0.19 to -0.07   | <0.001   |
|                                       |          |                    |                  |          |
| <b>TLC (mL)</b>                       | 883      | 14.6               | 7.7 to 21.5      | <0.001   |
| <b>FRC (mL)</b>                       | 884      | 14.9               | 8.5 to 21.3      | <0.001   |
| <b>RV (mL)</b>                        | 883      | 9.9                | 6.4 to 13.5      | <0.001   |
| <b>Raw (cmH<sub>2</sub>O/L/s)</b>     | 884      | 0.003              | -0.004 to 0.011  | 0.413    |
| <b>sGaw (mL/s/cmH<sub>2</sub>O/L)</b> | 884      | -2.5               | -3.9 to -1.1     | 0.001    |
|                                       |          |                    |                  |          |
| <b>TLCO (mL/min/mmHg)</b>             | 841      | -0.134             | -0.189 to -0.079 | <0.001   |
| <b>TLCO/VA (mL/min/mmHg/L)</b>        | 841      | -0.027             | -0.035 to -0.018 | <0.001   |
| <b>VA (mL)</b>                        | 894      | 7.4                | 0.6 to 14.3      | 0.034    |

**Online table 5. Associations of cannabis and tobacco use with post-bronchodilator spirometry.**

Linear regression analyses of post-bronchodilator spirometry at age 32 using both cannabis and tobacco exposures as predictors. Analyses adjust for sex and, except for FEV<sub>1</sub>/FVC, for height. Coefficients represent the difference in lung function associated with each joint-year of cannabis or pack-year of tobacco up to age 32, adjusted for the use of the other substance.

|                                |     | Cannabis |               |       | Tobacco |                |        |
|--------------------------------|-----|----------|---------------|-------|---------|----------------|--------|
|                                | n   | Coeff    | 95% CI        | p     | Coeff   | 95% CI         | p      |
| <b>FEV<sub>1</sub> (mL)</b>    | 892 | 7.2      | -0.2 to 14.6  | 0.058 | -6.7    | -11.7 to -1.7  | 0.009  |
| <b>FVC (mL)</b>                | 892 | 13.4     | 4.5 to 22.4   | 0.003 | -0.8    | -6.9 to 5.2    | 0.784  |
| <b>FEV<sub>1</sub>/FVC (%)</b> | 892 | -0.05    | -0.14 to 0.04 | 0.310 | -0.12   | -0.18 to -0.06 | <0.001 |

**Online table 6. Longitudinal associations of cannabis use with spirometric lung function amongst non-tobacco smokers.**

Linear regression analyses of lung function at age 32 using cannabis exposure as the predictor, adjusted for lung function at age 15. Analyses are restricted to those without a tobacco smoking history. Analyses adjust for sex, height, change in height between age 15 and 32, and current asthma at age 32. Coefficients represent the difference in lung function at age 32 associated with each joint-year of cannabis up to age 32.

|                                | <b>n</b> | <b>Coefficient</b> | <b>95% CI</b> | <b>p</b> |
|--------------------------------|----------|--------------------|---------------|----------|
| <b>FEV<sub>1</sub> (mL)</b>    | 391      | 5.4                | -7.1 to 18.0  | 0.396    |
| <b>FVC (mL)</b>                | 391      | 13.4               | -0.8 to 27.6  | 0.064    |
| <b>FEV<sub>1</sub>/FVC (%)</b> | 391      | -0.07              | -0.23 to 0.08 | 0.348    |
